2022 | VOLUME 75 | NUMBER 3

# The American Journal of Psychotherapy

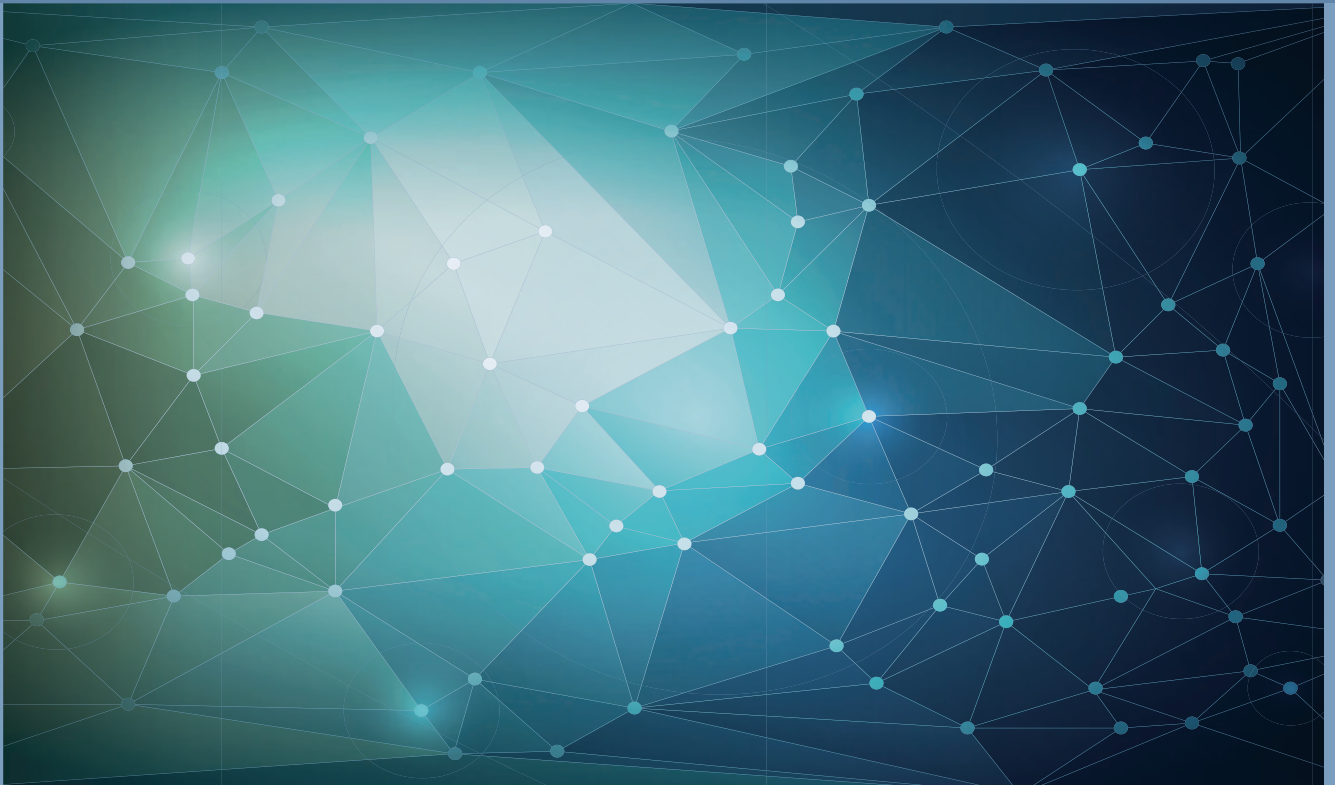

AMERICAN  
**PSYCHIATRIC**  
ASSOCIATION

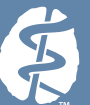

[psychotherapy.psychiatryonline.org](https://psychotherapy.psychiatryonline.org)
